# Supplementary material
Source: publisher figshare collection journal article supplement (https://acs.figshare.com/ndownloader/files/5672436)
Supplement: Supplementary file 1 [file 5672436]

# Supporting information Figure 1.

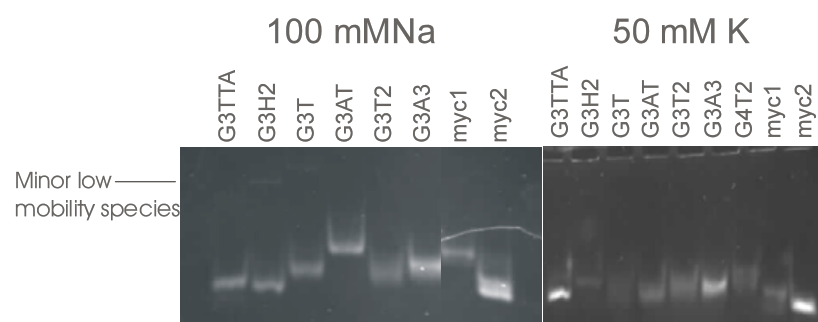

**Figure 1.** Mobility of the different DNA fragments on a 15% non-denaturing polyacrylamide gel, run in the presence of 100 mM Na or 50 mM K.
